1 **Architectural traits constrain the evolution of unisexual flowers and**  
2 **sexual segregation within inflorescences: an interspecific approach**

3

4

5 **Rubén Torices<sup>1,2</sup>, Ana Afonso<sup>3</sup>, Arne A. Anderberg<sup>4</sup>, José M. Gómez<sup>1</sup> and Marcos**  
6 **Méndez<sup>5</sup>**

7

8 <sup>1</sup>Departamento de Ecología Funcional y Evolutiva, Estación Experimental de Zonas Áridas (EEZA-  
9 CSIC), Carretera de Sacramento s/n, 04120 La Cañada de San Urbano, Almería, Spain

10

11 <sup>2</sup> Department of Ecology and Evolution, University of Lausanne, Biophore Building, CH-1015 Lausanne,  
12 Switzerland

13

14 <sup>3</sup>Centro de Ecología Funcional, Universidade de Coimbra, Calçada Martim de Freitas, 3000-456  
15 Coimbra, Portugal

16

17 <sup>4</sup>Department of Botany, Swedish Museum of Natural History, P.O. Box 50007, SE-104 05 Stockholm,  
18 Sweden

19

20 <sup>5</sup>Área de Biodiversidad y Conservación, Universidad Rey Juan Carlos, E-28933 Móstoles-Madrid, Spain

21

22

23

24 **Contact information**

25 *Rubén Torices*

26 Departamento de Ecología Funcional y Evolutiva, Estación Experimental de Zonas  
27 Áridas (EEZA-CSIC)

28 Carretera de Sacramento s/n, 04120 La Cañada de San Urbano, Almería, Spain

29 Phone: +34 950 28 10 45

30 Fax: +41 950 27 71 00

31 e-mail: [rubentorices@gmail.com](mailto:rubentorices@gmail.com)

32

33 **Running head:** Sexual specialization of flowers

34 **Keywords:** Asteraceae, hermaphroditism, gamete packaging, gynomonoeicy, monoecy,  
35 sex allocation, sexual systems.

36

37

38 **ABSTRACT**

39

40           Male and female unisexual flowers have repeatedly evolved from the ancestral  
41 bisexual flowers in different lineages of flowering plants. This sex specialization in  
42 different flowers often occurs within inflorescences. We hypothesize that inflorescence  
43 architecture may impose a constraint on resource availability for late flowers,  
44 potentially leading to different optima in floral sex allocation and unisexuality. Under  
45 this hypothesis we expect that inflorescence traits increasing the difference in resource  
46 availability between early and later flowers would be phylogenetically correlated with a  
47 higher level of sexual specialization. To test this hypothesis, we performed a  
48 comparative analysis of inflorescence traits (inflorescence size, number of flowers and  
49 flower density) in the sunflower family, which displays an extraordinary variation in  
50 floral sexual specialization at the inflorescence level, i.e. hermaphroditic,  
51 gynomonoecious and monoecious species. We found that species with a complete sex  
52 separation in unisexual flowers (monoecy) had significantly denser inflorescences.  
53 Furthermore, those species arranging their flowers in denser inflorescences also showed  
54 greater differences in the size of early and late fruits, a proxy of resource variation  
55 between flowers. Our findings support the idea that floral sexual specialization and  
56 consequently sexual segregation may be the consequence of different floral sex  
57 allocation optima driven by the sequential development of flowers that results in a  
58 persistent resource decline from earlier to later flowers.

59

## 60 INTRODUCTION

61 Most angiosperms are hermaphrodite, i.e., they produce bisexual or 'perfect'  
62 flowers bearing both functional pollen grains and ovules. Combining both sexual  
63 functions in the same flower reduces direct reproduction costs, such as sharing attractive  
64 structures for pollinators (Charnov et al. 1976), and acts as an insurance against vagaries  
65 in the mating environment by allowing selfing (Wilson and Harder 2003). Thus,  
66 evolutionary biologists have wondered, since Darwin (1877), what favours non-  
67 hermaphroditic sexual systems, where flowers of different sex -male, female, or  
68 bisexual- are combined in the same or different individuals of a population. Darwin  
69 (1877) interpreted the evolution of unisexual flowers as a means of reducing selfing.  
70 Nevertheless, the simultaneous presence of self-incompatibility and unisexual flowers  
71 in many angiosperms (Bertin 1993) suggests that avoiding selfing is not the only driver  
72 of sexual specialization in flowers. Alternative explanations for the evolution of sexual  
73 specialization are the avoidance of interference between sexual functions (Charnov  
74 1979; Willson 1979) and optimal resource allocation (Janzen 1977; Willson 1979;  
75 Lloyd 1982).

76 Any evolutionary explanation of sexual specialization of flowers should  
77 consider that sexes are often segregated within inflorescences due to two constraints set  
78 by inflorescence architecture. The first constraint is ontogenetic (Lee 1988; Diggle  
79 1995, 2003): because flowers within inflorescences usually develop sequentially, early  
80 flowers usually flower and ripen fruits first and pre-empt resources for late flowers. The  
81 second constraint is strictly positional (Diggle 2003) and results in a persistent  
82 limitation of resources at certain flower positions inherent to the architecture of  
83 inflorescence axes. Both constraints provide a general proximate mechanism for sexual  
84 selection, because they can strongly influence the mating environment or resource

85 availability experienced by individual flowers (Brunet and Charlesworth 1995; Diggle  
86 2003; Harder and Prusinkiewicz 2013). As resource availability may differentially  
87 affect male and female performance (Freeman et al. 1980, Lau and Stephenson 1993),  
88 this resource gradient across flowers within an inflorescence could also lead to  
89 differential sexual specialization in female or male functions at different floral  
90 positions.

91         On theoretical grounds, a female-biased floral allocation can be predicted in  
92 those floral positions in the inflorescence with higher resource availability, whereas a  
93 male-biased allocation will be expected in positions with less resources (Brunet and  
94 Charlesworth 1995). Intraspecific observational (Diggle 2003) and experimental  
95 evidence (Emms 1993; Diggle 1994) supports this idea, at least for plants with  
96 elongated inflorescences. For instance, *Solanum hirtum* produces inflorescences with  
97 bisexual flowers, but the late (distal) ones are labile, becoming male in resource-  
98 depleted plants (Diggle 1994). Nevertheless, it remains poorly understood whether these  
99 intraspecific plastic responses in sexual specialization and segregation within  
100 inflorescences can actually become fixed during the evolution of a lineage (Diggle  
101 2003; Torices and Méndez 2010), giving rise to the sexual segregation within  
102 inflorescences observed in many angiosperm families. The exception is a pioneer  
103 comparative study of *Solanum* that found how plastic responses in the production of  
104 male unisexual flowers are ancestral to fixed position effects (Diggle and Miller 2013).  
105 Here, we take this comparative approach a step further, by using Asteraceae to test at a  
106 family level whether the degree of sexual specialization is phylogenetically correlated  
107 with inflorescence architectural traits which may lead to a resource decline from early to  
108 late flowers.

109           We hypothesize that three architectural traits of inflorescences, namely larger  
110 size, and higher flower number and density increase resource competition among  
111 flowers and likely constrain resource availability for late flowers, potentially leading to  
112 male-biased floral sex allocation and unisexuality. Testing this hypothesis at an  
113 interspecific level faces two challenges. First, inflorescences may differ impressively  
114 across species in size, number of flowers, fruit size and flower size, even within the  
115 same main inflorescence type (Leppik 1977; Burt 1977; Wyatt 1982; Harder et al.  
116 2004). Second, these traits do not necessarily covary across species, because  
117 inflorescence size and flower number are under selection by several ecological drivers,  
118 such as pollinators (Willson and Rathcke 1974; Thomson 1988; Andersson 1996;  
119 Kirchner et al. 2005; Iwata et al. 2012), seed predators (Fenner et al. 2002), or altitude  
120 and geographic ranges (Fenner et al. 2001). Consequently, the diversity of trait  
121 combinations across species could obscure the detection of patterns in sexual  
122 specialization. In particular, a negative covariation between flower size and number  
123 (Sargent et al. 2007; Goodwillie et al. 2010; Vasconcelos and Proença 2015) could lead  
124 to similar resource competition and flower density may be the more reliable indicator of  
125 resource competition among flowers within an inflorescence.

126           In this study, we compared species of the sunflower family showing different  
127 levels of floral sexual specialization to test whether they show different inflorescence  
128 traits. We then assessed how these inflorescence traits correlate with resource  
129 differences between flowers within the same inflorescence. The sunflower family  
130 (Asteraceae) is a suitable model for testing this hypothesis. First, all Asteraceae share  
131 the same basic inflorescence architecture, the head or capitulum (Funk et al. 2009),  
132 which mainly follows a centripetal pattern in floral development and blooming (Harris  
133 1995; Pozner et al. 2012). Second, three different sexual systems are common in

134 Asteraceae, each showing a phylogenetic gradient in sexual specialization (Torices et al.  
135 2011): hermaphroditism, gynomonoecy and monoecy (Fig. 1). Third, a clear pattern of  
136 sexual specialization is present within inflorescences in non-hermaphroditic species.  
137 Namely, gynomonoecious species produce female flowers at the outermost positions  
138 and bisexual ones in the inner positions, while monoecious species show female flowers  
139 in the outermost positions and male flowers in inner positions (Fig. 1). Finally, there is  
140 anatomical (Alkio and Grimm 2003), physiological (Alkio et al. 2003;) and  
141 experimental evidence that architectural constraints occur within heads, and both outer  
142 flowers and positional effects can limit the available resources to late-blooming, inner  
143 flowers (Torices and Méndez 2010).

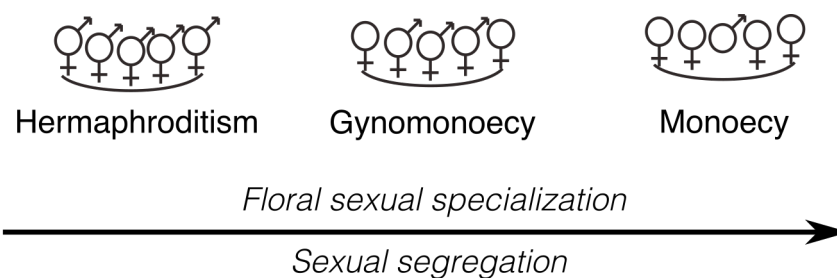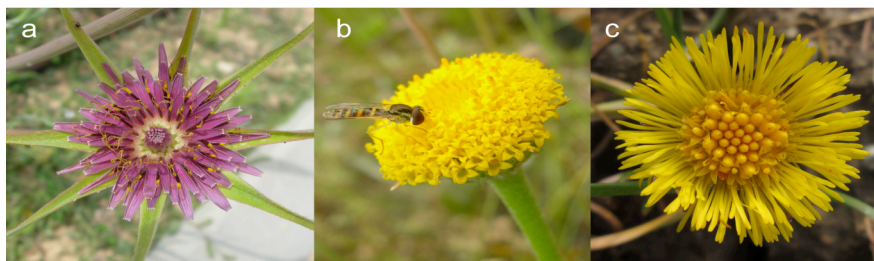

145 **Figure 1. Sexual specialization in the Asteraceae inflorescences.** Three different  
146 types of functionally hermaphroditic inflorescences and individuals can be observed in  
147 the Asteraceae: hermaphroditic, gynomonoecious and monoecious. Allocation of  
148 gametes to different flowers shows a gradient in floral sexual specialization from  
149 hermaphroditic species (only bisexual flowers) to gynomonoecious species (female and  
150 bisexual flowers) and to monoecious species (female and male flowers). In Asteraceae,  
151 sexual specialization (i.e., bi- vs. unisexuality in flowers) and sexual segregation within  
152 inflorescences occur in concert. Lower panels show representative species from a)  
153 hermaphroditic heads (*Tragopogon porrifolius* L.), b) gynomonoecious heads  
154 (*Anacyclus valentinus* L.), and c) monoecious heads (*Tussilago farfara* L.).  
155

156           In this paper, we followed a comparative approach to study the role of  
157 architectural constraints in the evolution of floral sexual specialization and sexual  
158 segregation within inflorescences in the Asteraceae. Specifically, we assessed how  
159 inflorescence traits (namely, inflorescence size, number of flowers, and flower density)  
160 were associated with different levels of floral sexual specialization and sexual  
161 segregation represented by hermaphroditic, gynomonoeious and monoecious species  
162 (Fig. 1). In addition, we assessed how these inflorescence traits affected variation in  
163 fruit size within the inflorescences, as a proxy for the resource gradient between flower  
164 positions (Lee 1988; Stephenson 1992). Finally, we tested whether female flowers in an  
165 inflorescence produce larger fruits than bisexual ones, as would be expected if sexual  
166 specialization 'releases' female flowers from expending resources on male structures and  
167 compensated the lack of the male sex function by producing larger fruits than bisexual  
168 flowers.

169

## 170 **MATERIAL AND METHODS**

### 171 **Study species**

172           The Asteraceae is the largest family of angiosperms, with over 1,500 genera and  
173 25,000 species, and a worldwide distribution (Funk et al. 2009). All Asteraceae share  
174 the same basic inflorescence, the head or capitulum, a dense indeterminate inflorescence  
175 where all the flowers are sessile and attached to a common receptacle (Fig. 1). Heads  
176 represent the basic pollinator attraction unit (Burt 1977; Leppik 1977). Different  
177 degrees of sexual segregation within the heads can be observed among species of the  
178 family (Fig. 1). From hermaphroditism to monoecy, a floral sexual specialization  
179 occurring in individual flowers. The evolutionary transition between them occurs

180 through a gynomonoecious intermediate that bears both female and bisexual flowers  
181 (Torices et al. 2011).

182 We included a total of 97 species in our study, including 44 hermaphroditic, 30  
183 gynomonoecious and 23 monoecious species (Supplementary Table S1). The species  
184 were studied on material from two herbaria: the Asteraceae collection of the Swedish  
185 Natural History Museum Herbarium (S), and the Herbarium of the University of  
186 Coimbra (COI). Herbarium sampling allowed a comprehensive sampling of Asteraceae  
187 diversity, since different evolutionary lineages coming from different continents and  
188 biomes were sampled.

189

#### 190 **Inflorescence and fruit traits**

191 Three traits were measured at an inflorescence level in the 97 species: (i)  
192 inflorescence size, measured as the head diameter in mm; (ii) the number of flowers per  
193 inflorescence; and (iii) flower density, calculated as the ratio between the number of  
194 flowers and the area of each head. Flower density was used as a measure of floral  
195 aggregation and may provide a better proxy of resource competition between flowers  
196 within the head than head size or number of flowers per head.

197 To minimize specimen damage, we sampled only those specimens with mature  
198 fruits, i.e. fruiting heads, in which we measured inflorescence and fruit traits. Fruiting  
199 heads in Asteraceae usually retain the size and structure of the inflorescence and  
200 therefore they can be used to describe inflorescence traits such as size and number of  
201 flowers. First, we searched those specimens belonging to the species included in the  
202 phylogenetic supertrees published for this family (Funk et al., 2005; Funk, 2009).  
203 Second, we selected herbarium specimens with enough mature fruiting heads and with  
204 good conservation status. For each species, one specimen was selected, and at least one



205 capitulum was sampled. Following this procedure, 100 herbarium specimens were  
206 sampled (78 from S and 22 from COI; Supplementary Table S1).

207 All fruiting heads were dissected to separate all fruits in their relative positions  
208 within heads from the outermost to the innermost positions. When necessary, heads  
209 were placed in water with a detergent for rehydration and to reduce damage to the head.  
210 Data were collected for 70 species. Heads and fruits were measured using pictures taken  
211 with a tripod-stabilized digital camera. More than 2,700 fruits were measured as the  
212 two-dimensional projection of their outline using Image J 1.54s software (Schneider et  
213 al. 2012). Although low intraspecific sample sizes may lead to increased type I error in  
214 comparative studies, this effect is important only when coupled with high intraspecific  
215 variation (Harmon and Losos 2005). However, when the range of taxa studied is wide,  
216 variation across species is usually much greater than variation within species. In our  
217 study, fruit size varied between species investigated, the largest fruits were more than  
218 100-fold larger than the smallest fruits, whereas no single species showed such a degree  
219 of variation in fruit size.

220

## 221 **Statistical analyses**

### 222 *Relationship between inflorescence traits and floral sexual specialization*

223 We used phylogenetic generalized least squared (PGLS) models (Freckleton et  
224 al. 2002; Paradis 2012) to explore the relationship between the degree of floral sexual  
225 specialization (hermaphroditism, gynodioecy or monoecy) and inflorescence traits.  
226 All models were evaluated under both an adaptive model (OU, Ornstein-Uhlenbeck  
227 model) and a neutral model of evolution (BM, Brownian motion model) (Felsenstein  
228 2004). PGLS were fitted using the “ape” (Paradis et al. 2004) and “geiger” packages  
229 (Harmon et al. 2008) in R. The fittest model for each combination of variables was

230 selected using a likelihood ratio test comparing BM and OU models. For all fitted  
231 models, the OU model had a higher goodness of fit than the BM (results not shown).  
232 Therefore, we present only the results fitted under an OU model. The phylogenetic  
233 relationship between the species included in the analyses was considered by using the  
234 phylogenetic supertree published for the Asteraceae (Funk et al. 2005), adding a  
235 calibration to include branch lengths (Torices 2010). The root of this tree was  
236 previously scaled to 1 for all the analyses. Specific comparisons between  
237 hermaphroditism, gynodioecy and monoecy were explored using the marginal means,  
238 using the ‘lsmeans’ package (Lenth 2016) in R (R Development Core Team, 2015),  
239 which can be defined as a linear combination of the estimated effects from a linear  
240 model.

241

#### 242 *Relationships between fruit size, inflorescence traits and floral sexual specialization*

243 We explored how fruit size variation within inflorescences, as a proxy of the  
244 resource gradient between flower positions, was related to inflorescence traits and floral  
245 sexual specialization, using the meta-analytical effect size to get a standardized measure  
246 of the magnitude of the difference among the size of the outer and inner fruits (fruit size  
247 difference, hereafter FSD). A random-effects meta-analysis was used. Effect sizes were  
248 calculated using the ‘meta’ package in R (Schwarzer 2015).

249 The correlation between FSD and fruit size with the degree of floral sexual  
250 specialization was explored using PGLS models. FSD and fruit size were the response  
251 variables, whereas the degree of floral sexual specialization was the predictor variable.  
252 All models were evaluated under both an OU and a BM model (see above).

253 In addition, we assessed the allometric relationships of inflorescence traits (head  
254 diameter, number of flowers and flower density) with FSD and outer and inner fruit  
255 sizes. These allometric relationships were tested by fitting PGLS models. FSD and fruit

256 size were the response variables, and the three inflorescence traits were the predictor  
257 variables. For those significant correlations, we estimated phylogenetic reduced major  
258 axis regressions (phyloRMA) and tested whether phyloRMA slopes were significantly  
259 different from one using the ‘phyl.RMA’ function included in the ‘phytools’ package  
260 (Revell 2012). All variables were log-transformed before analysis.

261

### 262 *Relationship between floral sexual specialization and fruit size*

263 We explored whether unisexual flowers produced larger fruits than bisexual  
264 flowers. We assessed the effect of floral sexual specialization (female vs. bisexual  
265 flowers) using only the outer fruits because strictly female flowers are found only in  
266 these positions. In addition, given the strong effect of inflorescence traits on fruit size  
267 (see Results), we included in the model the density of flowers, to control for the size of  
268 the inflorescence and the number of flowers. We fitted two PGLS models, where fruit  
269 size was the response variable and flower sex was included as a predictor categorical  
270 variable. Flower density was included as a continuous predictor variable. The only  
271 difference between both models was the inclusion of an interaction term between the  
272 sex of the flower and the flower density. The model including an interaction did not  
273 perform better and was thus dropped. Fruit size and flower density were log-  
274 transformed. We evaluated this model under OU and BM correlation structures.

275

## 276 **RESULTS**

### 277 **Inflorescence traits and floral sexual specialization**

278 Inflorescence traits differed significantly among the degrees of floral sexual  
279 specialization, i.e., hermaphroditism, gynodioecy, and monoecy (Table 1).  
280 Hermaphroditic and gynodioecious species displayed larger inflorescences than

281 monoecious species (Fig. 2a). Gynomonoecious species had significantly more flowers  
282 per inflorescence than hermaphroditic and monoecious species (Fig. 2b). Nevertheless,  
283 flower density was correlated with the degree of floral sexual specialization, increasing  
284 from hermaphroditic through gynomonoecious to monoecious species (Fig. 2c).

285 Inflorescence size was significantly correlated to the other two inflorescence  
286 traits (Supplementary Table S2). The number of flowers increased disproportionately  
287 with an increase in inflorescence size, whereas flower density disproportionately  
288 decreased with an increase in inflorescence size, measured as head diameter  
289 (Supplementary Table S3). Number of flowers and flower density were only marginally  
290 correlated (Supplementary Table S2), and flower density increased proportionally with  
291 an increased number of flowers (Supplementary Table S3).

292

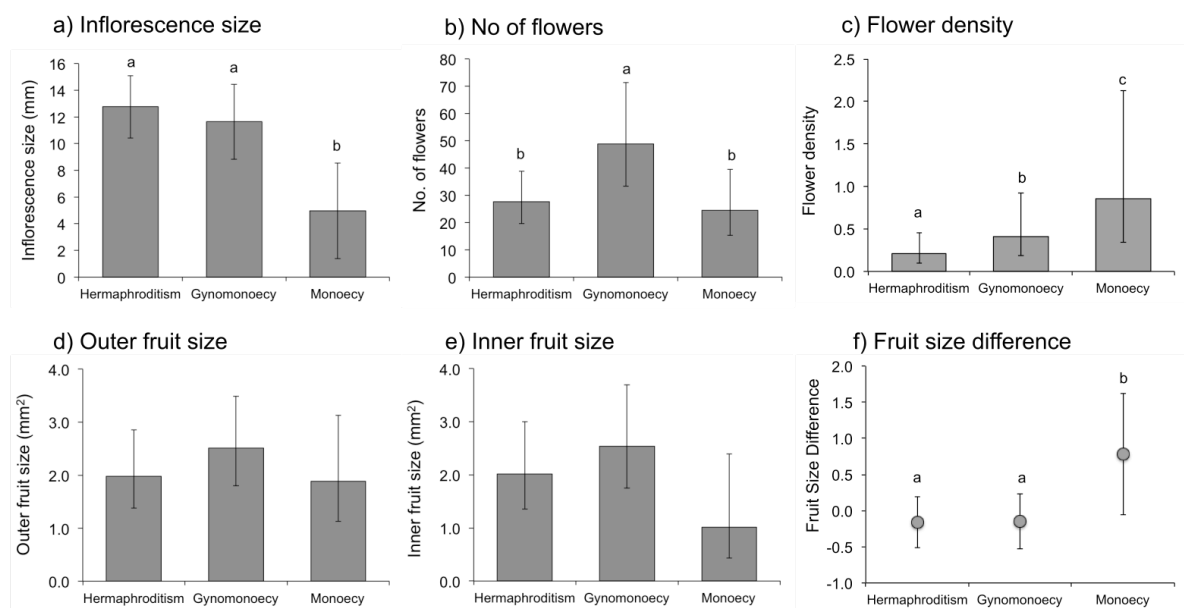

293

294 **Figure 2.** Phylogenetically controlled least-squares means (± 95% confidence interval)  
295 of (a) inflorescence size (mm), (b) number of flowers, (c) flower density (no. flowers /  
296 mm<sup>2</sup>), (d) outer fruit size, (e) inner fruit size, and (f) Fruit Size Difference (FSD) for  
297 different levels of sexual systems representing increasing levels of floral sexual  
298 specialization within inflorescences: hermaphroditism, gynomonoecy and monoecy.  
299 FSD is the standardized fruit size difference between outer and inner fruits measured as  
300 the meta-analytical effect size. Means sharing the same superscript letter were not  
301 significantly different at the  $P < 0.05$  level.

### 302 Fruit size variation within inflorescences

303 Fruit size was not statistically different between hermaphroditic,  
304 gynomonocious and monoecious species, either for outer or inner positions (Table 1;  
305 Fig. 2d,e). Two different relationships between fruit size and inflorescence traits were  
306 observed, independently of position in the head. First, fruit size significantly increased  
307 with an increase in inflorescence size (Fig. 3a). The phylogenetic RMA slopes were  
308 significantly higher than one (outer fruits:  $b = 1.34$ ,  $t = 3.16$ , d.f. = 68.9,  $P = 0.002$ ;  
309 inner fruits:  $b = 1.40$ ,  $t = 3.64$ , d.f. = 57.4,  $P < 0.001$ ) indicating a disproportionate  
310 increase in fruit size with an increase in inflorescence diameter (Fig. 3a). Second, fruit  
311 size decreased with an increase in flower density (Fig. 3c). The phylogenetic RMA  
312 slopes were significantly  $< 1.0$  (outer fruits:  $b = -0.79$ ,  $t = 3.31$ , d.f. = 61.4,  $P = 0.002$ ;  
313 inner fruits:  $b = -0.82$ ,  $t = 2.78$ , d.f. = 51.7,  $P = 0.008$ ). Therefore, fruit size decreased at  
314 a lower rate than the increase in flower density (Fig. 3c). Fruit size was not statistically  
315 correlated with flower number (Fig. 3b).

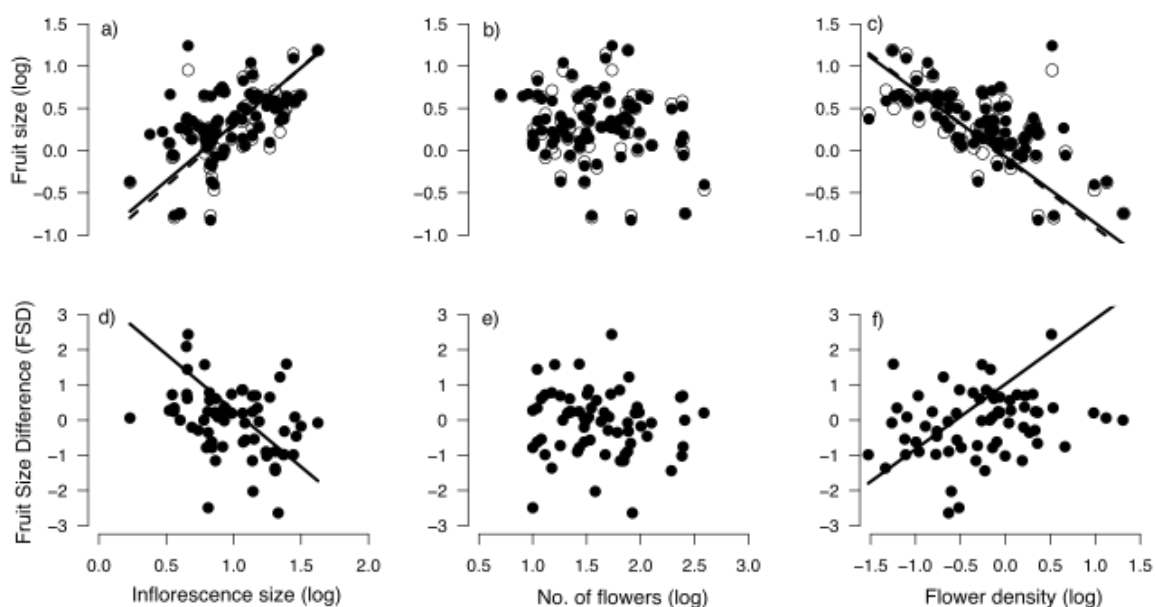

316

317 **Figure 3.** Phylogenetic RMA regressions between fruit size and a) inflorescence size  
318 (mm), b) number of flowers, and c) flower density (no. flowers / mm<sup>2</sup>); and between  
319 FSD and d) inflorescence size (mm), e) number of flowers, and f) flower density (no.  
320 flowers / mm<sup>2</sup>). In the upper row black dots and solid lines represent outer fruits

321 whereas white dots and dashed lines indicate inner fruits. Lines represent RMA slopes.  
322 Phylogenetic standard regression slopes are showed in Supplementary Table 4.  
323

324 FSD, the standardized fruit size difference, significantly decreased with an  
325 increase in inflorescence size (Fig. 3d;  $b = -3.20$ ,  $t = 10.24$ , d.f. = 62.2,  $P < 0.0001$ ),  
326 implying that smaller heads showed a higher difference between outer and inner fruits.  
327 FSD did not show any significant relationship with the number of flowers (Fig. 3e),  
328 although it significantly increased with flower density (Fig. 3f), revealing that an  
329 increase in flower density was associated with a higher difference in size between outer  
330 and inner fruits ( $b = 1.85$ ,  $t = 5.28$ , d.f. = 61.9,  $P < 0.0001$ ). The degree of sexual  
331 specialization did not significantly affect FSD (Table 1). However, the post-hoc  
332 comparison between degrees of sexual specialization showed that monoecious species  
333 had significantly larger FSD than hermaphroditic and gynomonocious species (Fig.  
334 2e). This difference was mainly mediated by the differences among sexual systems in  
335 flower density, because the inclusion of flower density as a covariate removed any  
336 statistical difference between monoecious species and the other two categories  
337 considered (Supplementary Table S5).

338

### 339 **Floral sexual specialization and fruit size**

340 Fruit size decreased with increasing flower density ( $F_{1,76} = 109.03$ ,  $P < 0.0001$ ;  
341 Fig. 4). Nevertheless, female flowers produced significantly larger fruits than bisexual  
342 flowers after controlling by flower density ( $F_{1,76} = 5.87$ ,  $P = 0.018$ ,  $n = 78$ ; Fig. 4).

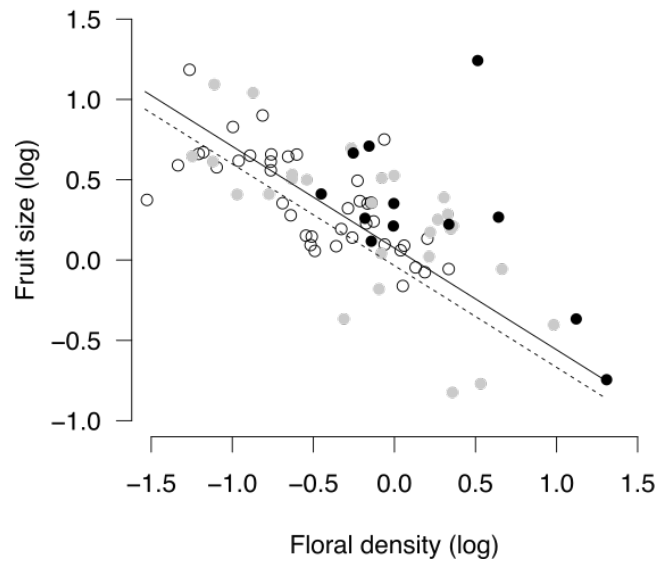

343

344 **Figure 4.** Relationship between fruit size produced by female (filled dots and solid line)  
345 and bisexual flowers (white dots and dashed line) and flower density. Female flowers  
346 produced by monoecious species are shown as black dots whereas those produced by  
347 gynodioecious species are indicated by grey dots.  
348

349

## 350 **DISCUSSION**

351 Our comparative study across three sexual systems in Asteraceae provided clear  
352 support for a phylogenetic association between inflorescence traits, fruit size variation  
353 within inflorescences, and the degrees of sexual specialization and segregation. In  
354 particular, we observed that monoecious species bore smaller and denser inflorescences  
355 than hermaphroditic ones, also showing the largest fruit size difference (FSD) between  
356 outer and inner fruits. These results, together with the lack of a correlation between the  
357 number of flowers and the degree of sexual specialization, support the idea that floral  
358 sexual specialization and consequently sexual segregation within inflorescences of  
359 Asteraceae might in part be the result of different sex allocation optima brought about  
360 by architecturally mediated persistent resource limitation of the inner flowers.

361 Although selfing and geitonogamy avoidance has been considered an important  
362 factor in the evolution of floral sex specialization and sexual segregation within

363 inflorescences (Harder et al. 2000), on its own it is unlikely to explain the pattern  
364 observed in Asteraceae. The negative effects of geitonogamy are expected to be higher  
365 in large inflorescences, where a higher number of flowers can lead to longer floral bouts  
366 by pollinators (Harder and Barrett 1995). Thus, many-flowered inflorescences would be  
367 expected to show a higher probability of exhibiting unisexual flowers than few-flowered  
368 inflorescences. However, in our data set the number of flowers per inflorescence was  
369 not clearly related to sexual specialization (Fig. 3b). Moreover, outer seeds should be  
370 more outcrossed than inner ones, but evidence is scarce and inconclusive: two species  
371 have shown higher outcrossing rate in outer flowers than inner ones (Marshall and  
372 Abbott 1984, Cheptou et al. 2001), whereas two other studies have found no differences  
373 (Gibson 2001, Gibson and Tomlinson 2002). Finally, the species of this family usually  
374 show other mechanisms to avoid selfing such as self-incompatibility (Ferrer et al. 2007)  
375 and dichogamy (both at the flower and inflorescence levels; Burt 1977). Therefore,  
376 whether limiting geitonogamy plays a key role in the evolution of sexual segregation in  
377 Asteraceae requires further examination, because empirical evidence remains  
378 contradictory.

379         An alternative to the selfing avoidance hypothesis is that evolutionary transitions  
380 between sexual systems might have evolved as a way to optimize gamete packaging.  
381 Inflorescence traits, such as the number of flowers per inflorescence and the  
382 inflorescence size, are key components of gamete packaging strategies (Schoen and  
383 Dubuc 1990; Fishbein and Venable 1996). Our results suggest that shifts in the so called  
384 ‘inflorescence design’, i.e. number of flowers and size of the inflorescence, can have  
385 effects at the flower level too. In the Asteraceae, these shifts can have led to transitions  
386 between hermaphroditism, gynodioecy and dioecy, whereas the pollination unit  
387 keeps their mating opportunities through the retention of both male and female



388 functions. For instance, the increase in flower number is usually negatively correlated  
389 with flower size (Sargent et al. 2007; Goodwillie et al. 2010; Vasconcelos and Proença  
390 2015). Although larger inflorescences produced both more flowers and larger fruits in  
391 species in our sample, fruit size decreased with flower density. This indicates that  
392 resource competition can underlay the interspecific negative relationships between the  
393 number of flowers and fruit size.

394         Importantly, our study provides insights into how intraspecific size-number  
395 trade-offs can translate into negative covariation between traits across species. The  
396 consequences of this negative correlation between size and number at the inflorescence  
397 level were not the same for all flower positions. We observed that increased flower  
398 density led to decreases fruit size, especially at the innermost positions, resulting in a  
399 higher FSD (fruit size difference between outer and inner fruits). Flower density might  
400 thus amplify the effects of architectural constraints, which pervasively limit resources at  
401 the innermost positions. Under these circumstances, theory predicts that a high resource  
402 difference between flower positions can cause plants to allocate more resources to their  
403 female function in flowers with more resources, and to their male function in resource-  
404 depleted flowers (Brunet and Charlesworth 1995). This expectation agrees with the  
405 positional pattern observed for the sex of flowers in Asteraceae inflorescences (Fig. 1),  
406 where female unisexual flowers consistently appear at those earlier (or outer) floral  
407 positions that generally have a higher resource supply, whereas male unisexual flowers  
408 are displayed at the later (or inner) positions, which usually are the most resource-  
409 limited positions (Alkio and Grimm 2003; Alkio et al. 2003; Torices and Méndez 2010).  
410 Therefore, shifts in inflorescence traits modifying the density of flowers might  
411 secondarily cascade to other important floral traits such as flower and fruit size.

412 Specially, flower density might have a role on the evolution of floral sex functions,  
413 given its effects on fruit size and thus on the floral female performance.

414 Under the resource optimization hypothesis, floral sex specialization is expected  
415 to entail an improvement in fitness compared to bisexual flowers. Previous studies  
416 indicate that dioecious species have larger fruit set than cosexual species (Sutherland  
417 1986) and larger seed size (Vamosi et al. 2008). While there is not a formal test on  
418 dioecious species of the Asteraceae or in other groups where flowers are no longer the  
419 functional unit, our results support that when the inflorescence is the main pollination  
420 unit, architectural traits such as flower density may obscure direct comparisons between  
421 dioecious and non-dioecious species, given its effect on fruit size. In the Asteraceae,  
422 female unisexual flowers from both gynomonocious and monoecious species had  
423 significantly larger fruits than bisexual species, when the confounding effect of flower  
424 density was factored out. Thus, our study provides support for an intrinsic advantage of  
425 flower specialization at least in terms of female fitness.

426 Expectations of a negative covariation of traits across species assumes that  
427 everything else remains equal. Vamosi et al. (2008) did not find any difference in seed  
428 size between hermaphroditic and monoecious species. However it is unclear if  
429 hermaphroditic and monoecious species in their dataset differed in inflorescence traits,  
430 such as flower density, which could confound the effect of the floral sexual  
431 specialization on seed size. Positive correlations between inflorescence parts might be  
432 found if species differ in resource budget (the big house-big car effect, *sensu* Reznick et  
433 al. 2000). In addition, additional selective factors on dispersal performance, which  
434 usually occur at the fruit level, could indirectly drive shifts on inflorescence design. Our  
435 study only revealed the evolutionary drivers in the specialization of floral sex functions  
436 after taking into account other inflorescence traits that might otherwise have masked

437 those drivers. This underlies the strength of a comparative approach for understanding  
438 the mechanistic basis of the evolution of non-hermaphroditic sexual systems, in the line  
439 of Diggle & Miller (2013), even when considering phylogenetic scales above the genus  
440 level.

441

## 442 ***Conclusion***

443 Our results highlight the importance of considering architectural traits to  
444 understand phenotypic diversity in modular organisms, which can have important  
445 functional consequences (Herrera 2009 for a review). Architectural constraints may  
446 have profound consequences in modular organisms such as plants, influencing how  
447 male and female functions perform at different positions within one individual. In  
448 particular, the sequential development of inflorescences and asymmetric competition  
449 between early and late flowers lead to a gradient in the resource availability experienced  
450 by individual flowers within the inflorescences. Thus, a separation of male and female  
451 functions in different flowers might evolve not only to maximize mating patterns, but  
452 also to optimize resource allocation.

453 This combination of architectural constraints and selection for optimal sex  
454 allocation at the flower level could explain the pattern observed in large groups of  
455 plants other than the Asteraceae. In particular, it might have an important role in the  
456 evolution of floral sexual specialization of those species with inflorescences composed  
457 of small flowers that work together as pollination units, such as species of the Apiaceae,  
458 Dipsacaceae, some Fabaceae, or Eriocaulaceae. However, the effects of architectural  
459 constraints might not be limited to those groups with very small flowers, since  
460 inflorescences represent the actual unit of attraction in most angiosperms (Harder et al.  
461 2004). Flowering plants usually aggregate their flowers in inflorescences, and these

462 inflorescences follow common development patterns. Similar comparative studies  
463 including inflorescence traits, sexual expression and fruit size variation across flowers  
464 will show us the generality of this mechanism in the evolution of unisexual flowers in  
465 Angiosperms.

466

467

## 468 **Acknowledgements**

469 We are especially grateful to John Pannell for the review of a previous version of the  
470 manuscript, and to L. DeSoto, S. Castro and F. Sales for their help in different stages of  
471 the study. RT was partially supported by the Spanish Ministry of Education (BVA  
472 2010-0375).

473

474

## 475 **References**

- 476 Andersson, S. 1996. Floral display and pollination success in *Senecio jacobaea*  
477 (Asteraceae): interactive effects of head and corymb size. *Am. J. Bot.* 83:71–75.
- 478 Alkio, M., and E. Grimm. 2003. Vascular connections between the receptacle and  
479 empty achenes in sunflower (*Helianthus annuus* L.). *J. Exp. Bot.* 54:345–348.
- 480 Alkio, M., A. Schubert, W. Diepenbrock, and E. Grimm. 2003. Effect of source – sink  
481 ratio on seed set and filling in sunflower (*Helianthus annuus* L.). *Plant. Cell*  
482 *Environ.* 26:1609–1619.
- 483 Bertin, R. I. 1993. Incidence of monoecy and dichogamy in relation to self-fertilization  
484 in angiosperms. *Amer. J. Bot.* 80:557-560.
- 485 Brunet, J., and D. Charlesworth. 1995. Floral sex allocation in sequentially blooming  
486 plants. *Evolution* 49:70–79.

- 487 Burt, B. L. 1977. Aspects of diversification in the capitulum. Pp. 41-59 in V. Heywood,  
488 J. B. Harborne, B. L. Turner, eds. The biology and chemistry of the Compositae.  
489 Vol. 1. Academic Press, London.
- 490 Charnov, E. L. 1979. Simultaneous hermaphroditism and sexual selection. *Proc. Natl.*  
491 *Acad. Sci. USA* 76: 2480-2484.
- 492 Charnov, E. L., J. Maynard Smith, J. J. Bull. 1976. Why be an hermaphrodite? *Nature*  
493 263: 125-126.
- 494 Charnov, E. L. 1987. On sex allocation and selfing in higher plants. *Evol. Ecol.* 12:30–  
495 36.
- 496 Cheptou, P. O., J. Lepart, and J. Escarre. 2001. Differential outcrossing rates in  
497 dispersing and non-dispersing achenes in the heterocarpic plant *Crepis sancta*  
498 (Asteraceae). *Evol. Ecol.* 15:1–13.
- 499 Darwin, C. 1877. The different forms of flowers on plants of the same species. John  
500 Murray, London, U.K.
- 501 Diggle, P. K. 1994. The expression of andromonoecy in *Solanum hirtum* (Solanaceae):  
502 phenotypic plasticity and ontogenetic contingency. *Am. J. Bot.* 81: 1354-1365.
- 503 Diggle, P. K. 1995. Architectural effects and the interpretation of patterns of fruit and  
504 seed development. *Annu. Rev. Ecol. Syst.* 26:531–552.
- 505 Diggle, P. K. 2003. Architectural effects on floral form and function: a review. Pp. 63–  
506 80 in T. Stuessy, E. Hörandl, and V. Mayer, eds. Deep morphology: toward a  
507 renaissance of morphology in plant systematics. Königstein, Germany: Koeltz.
- 508 Diggle, P. K., and J. S. Miller. 2013. Developmental plasticity, genetic assimilation, and  
509 the evolutionary diversification of sexual expression in *Solanum*. *Am. J. Bot.*  
510 100:1050-1056.

- 511 Emms, S. K. 1993. Andromonoecy in *Zigadenus paniculatus* (Liliaceae): Spatial and  
512 temporal patterns of sex allocation. *Am. J. Bot.* 80:914-923.
- 513 Felsenstein, J. 2004. Inferring phylogenies. Sinauer Associates, Sunderland.
- 514 Fenner, M., W. G. Lee, and E. H. Pinn. 2001. Reproductive features of *Celmisia* species  
515 (Asteraceae) in relation to altitude and geographical range in New Zealand. *Biol. J.*  
516 *Linn. Soc.* 74:51–58.
- 517 Fenner, M., J. E. Cresswell, R. A. Hurley, and T. Baldwin. 2002. Relationship between  
518 capitulum size and pre-dispersal seed predation by insect larvae in common  
519 Asteraceae. *Oecologia* 130:72–77.
- 520 Ferrer, M. M., and S. V Good-Avila. 2007. Macrophylogenetic analyses of the gain and  
521 loss of self-incompatibility in the Asteraceae. *New Phytol.* 173:401–14.
- 522 Fishbein, M., and D. L. Venable. 1996. Evolution of inflorescence design: theory and  
523 data. *Evolution* 50:2165–2177.
- 524 Freckleton, R. P., P. H. Harvey, and M. Pagel. 2002. Phylogenetic analysis and  
525 comparative data: a test and review of evidence. *Am. Nat.* 160:712–26.
- 526 Freeman, D. C., K. T. Harper, and El. L. Charnov. 1980. Sex change in plants: old and  
527 new observations and new hypotheses. *Oecologia* 47:222-232.
- 528 Funk, V. A., L. Watson, B. Gemeinholzer, E. Schilling, A. Susanna, and R. K. Jansen.  
529 2005. Everywhere but Antarctica: using a supertree to understand the diversity and  
530 distribution of the Compositae. *Biol. Skr.* 55:343–374.
- 531 Funk, V. A., A. Susanna, T. Stuessy, and R. J. Bayer, eds. 2009. Systematics, evolution,  
532 and biogeography of Compositae. International Association for Plant Taxonomy,  
533 Viena.

- 534 Gibson, J. 2001. Ecological and genetic comparison between ray and disc achene pools  
535 of the heteromorphic species *Prionopsis ciliata* (Asteraceae). *Int. J. Plant Sci.*  
536 162:137–145.
- 537 Gibson, J. P., A. D. Tomlinson, and A. S. College. 2002. Genetic diversity and mating  
538 system comparisons between ray and disc achene seed pools of the heterocarpic  
539 species *Heterotheca subaxillaris* (Asteraceae). *Int. J. Plant Sci.* 163:1025–1034.
- 540 Goodwillie, C., R. D. Sargent, C. G. Eckert, E. Elle, M. A. Geber, M. O. Johnston, S.  
541 Kalisz, D. A. Moeller, R. H. Ree, M. Vallejo-Marín, and A. A. Winn. 2010.  
542 Correlated evolution of mating system and floral display traits in flowering plants  
543 and its implications for the distribution of mating system variation. *New Phytol.*  
544 185:311-321.
- 545 Harder, L. D., and S. C. H. Barrett. 1995. Mating cost of large floral displays in  
546 hermaphrodite plants. *Nature* 373:512–515.
- 547 Harder, L. D., S. C. H. Barrett, and W. W. Cole. 2000. The mating consequences of  
548 sexual segregation within inflorescences of flowering plants. *Proc. R. Soc. B Biol.*  
549 *Sci.* 267:315–20.
- 550 Harder, L. D., C. Y. Jordan, W. E. Gross, and M. B. Routley. 2004. Beyond  
551 floricism: the pollination function of inflorescences. *Plant Species Biol.* 19:137–  
552 148.
- 553 Harder, L. D., and P. Prusinkiewicz. 2013. The interplay between inflorescence  
554 development and function as the crucible of architectural diversity. *Ann. Bot.*  
555 112:1477–1493.
- 556 Harmon, L. J., and J. B. Losos. 2005. The effect of intraspecific sample size on type I  
557 and type II error rates in comparative studies. *Evolution* 59:2705–2710.

- 558 Harmon L. J., J. T. Weir, C. D. Brock, R. E. Glor, and W. Challenger. 2008. GEIGER:  
559 investigating evolutionary radiations. *Bioinformatics* 24:129-131.
- 560 Harris, E. M. 1995. Inflorescence and floral ontogeny in Asteraceae: a synthesis of  
561 historical and current concepts. *Bot. Rev.* 61:93-278.
- 562 Herrera, C. M. 2009. Multiplicity in unity: plant subindividual variation and interactions  
563 with animals. The University of Chicago Press, London.
- 564 Imbert, E., J. Escarre, and J. Lepart. 1997. Seed heteromorphism in *Crepis sancta*  
565 (Asteraceae): performance of two morphs in different environments. *Oikos* 79:325–  
566 332.
- 567 Iwata, T., O. Nagasaki, H. S. Ishii, and A. Ushimaru. 2012. Inflorescence architecture  
568 affects pollinator behaviour and mating success in *Spiranthes sinensis* (Orchidaceae).  
569 *New Phytol.* 193:196–203.
- 570 Kirchner, F., S. H. Luijten, E. Imbert, M. Riba, M. Mayol, S. C. Gonza, and B. Colas.  
571 2005. Effects of local density on insect visitation and fertilization success in the  
572 narrow-endemic *Centaurea corymbosa* (Asteraceae). *Oikos* 111:130–142.
- 573 Janzen, D. H. 1977. A note on optimal mate selection by plants. *Am. Nat.* 111: 365-371.
- 574 Lau, T.-C., and A. G. Stephenson. 1993. Effects of soil nitrogen on pollen production,  
575 pollen grain size, and pollen performance in *Cucurbita pepo* (Cucurbitaceae). *Amer.*  
576 *J. Bot.* 80:763-768.
- 577 Lee, T. D. 1988 Patterns of fruit and seed production. Pp 179-202 in J. Lovett-Doust  
578 and L. Lovett-Doust. Plant reproductive ecology: patterns and strategies. Oxford  
579 University Press, New York.
- 580 Lenth, R. V. 2016. Least-squares means: the R package lsmeans. *J Stat Soft* 69:1-33.
- 581 Leppik, E. E. 1977. The evolution of capitulum types of the Compositae in the light of  
582 insect-flower interaction. Pp 61-89 in V. H. Heywood, J. B. Harborne, B. L. Turner,



- 583 eds. The biology and chemistry of the Compositae. Vol. 1. Academic Press, London,  
584 UK.
- 585 Lloyd, D. G. 1982. Selection of combined versus separate sexes in seed plants. *Am. Nat.*  
586 120:571-585.
- 587 Marshall, D. F., and R. J. Abbott. 1984. Polymorphism for outcrossing frequency at ray  
588 floret locus in *Senecio vulgaris* L. III. Causes. *Heredity* 53:145–149.
- 589 Paradis, E. 2012. Analysis of phylogenetics and evolution with R (Second Edition).  
590 Springer. New York.
- 591 Paradis, E., J. Claude, and K. Strimmer. 2004. APE: Analyses of phylogenetics and  
592 evolution in R language. *Bioinformatics* 20:289–290.
- 593 Pozner, R., C. Zanotti, and L. A. Johnson. 2012. Evolutionary origin of the Asteraceae  
594 capitulum: Insights from Calyceraceae. *Am. J. Bot.* 99:1–13.
- 595 R Core Team. 2015. R: A language and environment for statistical computing. R  
596 Foundation for Statistical Computing, Vienna, Austria. <http://www.R-project.org/>.
- 597 Revell, L. J. 2012. phytools: An R package for phylogenetic comparative biology (and  
598 other things). *Methods Ecol. Evol.* 3:217–223.
- 599 Reznick, D., L. Nunney, and A. Tessier. 2000. Big houses, big cars, superfleas and the  
600 costs of reproduction. *Trends Ecol. Evol.* 15:421-425.
- 601 Sargent, R. D., C. Goodwillie, S. Kalisz, and R. H. Ree. 2007. Phylogenetic evidence  
602 for a flower size and number trade-off. *Am. J. Bot.* 94:2059–2062.
- 603 Schneider, C. A., W. S. Rasband, and K. W. Eliceiri. 2012. NIH Image to ImageJ: 25  
604 years of image analysis. *Nat. Methods* 9:671–5.
- 605 Schoen, D. J., and M. Dubuc. 1990. The evolution of inflorescence size and number: a  
606 gamete-packaging strategy in plants. *Am. Nat.* 135:841–857.

- 607 Schwarzer, G. 2015. meta: general package for meta-analysis. R package version 4.1-0.  
608 <http://CRAN.R-project.org/package=meta>
- 609 Stephenson, A. G. 1992. The regulation of maternal investment in plants. Pp. 151-171  
610 in C. Marshall, J. Grace eds. Fruit and seed production: aspects of development,  
611 environmental physiology and ecology. Cambridge University Press, Cambridge.
- 612 Sutherland, S. 1986. Patterns of fruit-set: what controls fruit-flower ratios in plants?  
613 *Evolution* 40:117–128.
- 614 Thomson, J. D. 1988. Effects of variation in inflorescence size and floral rewards on the  
615 visitation rates of traplining pollinators of *Aralia hispida*. *Evol. Ecol.* 2:65–76.
- 616 Torices, R. 2010. Adding time-calibrated branch lengths to the Asteraceae supertree. *J.*  
617 *Syst. Evol.* 48:271–278.
- 618 Torices, R., and M. Méndez. 2010. Fruit size decline from the margin to the center of  
619 capitula is the result of resource competition and architectural constraints. *Oecologia*  
620 164:949–58.
- 621 Torices, R., M. Méndez, and J. M. Gómez. 2011. Where do monomorphic sexual  
622 systems fit in the evolution of dioecy? Insights from the largest family of  
623 angiosperms. *New Phytol.* 190:234–48.
- 624 Vamosi, S. M., S. J. Mazer, and F. Cornejo. 2008. Breeding systems and seed size in a  
625 neotropical flora: testing evolutionary hypotheses. *Ecology* 89:2461–72.
- 626 Vasconcelos, T. N. C., and C. E. B. Proença. 2015. Floral cost vs. floral display:  
627 Insights from the megadiverse Myrtales suggest that energetically expensive floral  
628 parts are less phylogenetically constrained. *Am. J. Bot.* 102:900–909.
- 629 Willson, M. F. 1979. Sexual selection in plants. *Am. Nat.* 113:777-790.
- 630 Willson, M. F. 1982. Sexual selection and dicliny in angiosperms. *Am. Nat.* 119:579-  
631 583.

- 632 Willson, M. F., and B. J. Rathcke. 1974. Adaptive design of the floral display in  
633 *Asclepias syriaca* L. *Am. Midl. Nat.* 92:47–57.
- 634 Wilson, W. G., and L. D. Harder. 2003. Reproductive uncertainty and the relative  
635 competitiveness of simultaneous hermaphroditism versus dioecy. *Am. Nat.* 162:220-  
636 241.
- 637 Wyatt, R. 1982. Inflorescence architecture: how flower number, arrangement, and  
638 phenology affect pollination and fruit-set. *Am. J. Bot.* 69:585–594.
- 639

640 **Tables**

641 **Table 1.** Differences in inflorescence and fruit traits between inflorescences with  
642 different degree of floral sexual specialization. *F* and *P* values were obtained after a  
643 deviance analysis of the phylogenetic generalized linear models fitted for each  
644 inflorescence trait, with the degree of floral sexual specialization within inflorescence  
645 (hermaphroditism, gynomonocy or monoecy) as the main factor. FSD is the  
646 standardized fruit size difference between outer and inner fruits measured as the meta-  
647 analytical effect size.

648

| <b>Inflorescence traits</b>                   | <i>F</i> | d.f.  | <i>P</i> |
|-----------------------------------------------|----------|-------|----------|
| Capitulum diameter (mm)                       | 7.27     | 2, 85 | 0.001    |
| Number of flowers                             | 3.65     | 2, 84 | 0.030    |
| Flower density (no. flowers/mm <sup>2</sup> ) | 6.99     | 2, 84 | 0.002    |
| Outer fruit size (mm <sup>2</sup> )           | 0.69     | 2, 77 | 0.505    |
| Inner fruit size (mm <sup>2</sup> )           | 2.01     | 2, 66 | 0.142    |
| FSD                                           | 2.30     | 2, 64 | 0.109    |

649

650

651

652

## 653 **Figure Legends**

654 **Figure 1. Sexual specialization in the Asteraceae inflorescences.** Three different  
655 types of functionally hermaphroditic inflorescences and individuals can be observed in  
656 the Asteraceae: hermaphroditic, gynomonoecious and monoecious. Allocation of  
657 gametes to different flowers shows a gradient in floral sexual specialization from  
658 hermaphroditic species (only bisexual flowers) to gynomonecious species (female and  
659 bisexual flowers) and to monoecious species (female and male flowers). In Asteraceae,  
660 sexual specialization (i.e., bi- vs. unisexuality in flowers) and sexual segregation within  
661 inflorescences occur in concert. Lower panels show representative species from a)  
662 hermaphroditic heads (*Tragopogon porrifolius* L.), b) gynomonoecious heads  
663 (*Anacyclus valentinus* L.), and c) monoecious heads (*Tussilago farfara* L.).

664

665 **Figure 2.** Phylogenetically controlled least-squares means ( $\pm$  95% confidence interval)  
666 of (a) inflorescence size (mm), (b) number of flowers, (c) flower density (no. flowers /  
667 mm<sup>2</sup>), (d) outer fruit size, (e) inner fruit size, and (f) Fruit Size Difference (FSD) for  
668 different levels of sexual systems representing increasing levels of floral sexual  
669 specialization within inflorescences: hermaphroditism, gynomonoecy and monoecy.  
670 FSD is the standardized fruit size difference between outer and inner fruits measured as  
671 the meta-analytical effect size. Means sharing the same superscript letter were not  
672 significantly different at the  $P < 0.05$  level.

673

674 **Figure 3.** Phylogenetic RMA regressions between fruit size and a) inflorescence size  
675 (mm), b) number of flowers, and c) flower density (no. flowers / mm<sup>2</sup>); and between  
676 FSD and d) inflorescence size (mm), e) number of flowers, and f) flower density (no.  
677 flowers / mm<sup>2</sup>). In the upper row black dots and solid lines represent outer fruits

678 whereas white dots and dashed lines indicate inner fruits. Lines represent RMA slopes.

679 Phylogenetic standard regression slopes are showed in Supplementary Table 4.

680

681 **Figure 4.** Relationship between fruit size produced by female (filled dots and solid line)

682 and bisexual flowers (white dots and dashed line) and flower density. Female flowers

683 produced by monoecious species are shown as black dots whereas those produced by

684 gynomonocious species are indicated by grey dots.
